# Supplementary material for: Impact of homocysteine levels on clinical outcome in patients with acute ischemic stroke receiving intravenous thrombolysis therapy
Source: PeerJ. 2020 Jul 10;8:e9474. doi: 10.7717/peerj.9474 (PMC7357565; doi:10.7717/peerj.9474)
Supplement: Supplemental Information 1 [file peerj-08-9474-s001.xlsx]

## Sheet: Sheet1
No	Gender(1 means Male; 2 means Female)	Age	Height(cm)	Dosage	Time from onset to thrombolysis(min)	DNT（Door to Needle Time)	Smoking(0 means no; 1 means yes)	Drinking history(0 means no; 1 means yes)	Hypertention(0 means no; 1 means yes)	DM/Impaired glucose tolerance(0 means no; 1 means yes)	Coronary artery disease(0 means no; 1 means yes)	Hyperlipidemia(0 means no; 1 means yes)	Previous history of cerebral infarction(0 means no; 1 means yes)	Atrial fibrillation(0 means no; 1 means yes)	Heart valve disease(0 means no; 1 means yes)	Comorbidities(0 means no comorbidity)	Hemorrhagic transformation(0 means no; 1 means yes)	Vascular stenosis(0 means no; 1 means yes)	Serum glucose before IVT	Uric acid before IVT	INR	D-D	Platelets	FT3	FT4	TT3	TT4	TSH	HGB	2-hour postprandial glucose	fasting glucose	ALT	Total Protein	Albumin	Direct Bilirubin	Total bilirubin	Blood urea nitrogen	Creatinin	Uric acid	AST	TC	TG	HDL	LDL	K	Na	Cl	Ca	P
1	2	63	156	50	125	43	0	0	1	1	0	1	0	0	0	0	0	0	5.1	&	0.93	0.4	367	4.17	11.77	1.38	74.9	1.842	6.1	10.3	5.5	20.9	71	45	2.3	8.9	4.3	54.2	336.1	21	6.03	1.85	1.25	4.24	4.01	142	101	2.31	1.26
2	1	91	170	81	73	38	0	0	1	0	0	0	0	1	0	Interstitial pneumonia	0	1	5.4	&	1.02	2.27	195	3.33	19.07	1.41	98.3	1.63	5.4	6.8	4.4	16.4	66	37	5.1	14.8	8.4	132.3	372.7	15	4.74	1.09	1.03	3.29	4.69	142	105	2.16	0.92
3	2	93	155	31	160	20	0	0	1	0	1	0	0	0	0	0	0	1	&	&	1.05	0.97	192	3.4	9.16	1.41	77.8	14.036	5.5	&	5	6.6	64	41	3.7	14.5	3.8	60.5	222.3	17	5.15	1.04	1.25	3.52	3.22	144	105	2.25	1.19
4	1	76	170	63	166	48	1	1	1	1	0	0	0	0	0	0	0	1	13.9	&	1.42	2.33	178	4.29	16.65	1.39	89.4	3.096	11.3	&	6.9	30.9	69	35	&	&	6.1	85.2	326.3	37.2	4.22	1.24	1.43	2.31	3.8	138	103	2.39	1.02
5	1	80	175	45	75	42	0	0	1	0	0	0	0	1	0	0	0	1	8.9	&	1.1	5.99	133	4.67	27.1	1.7	156.9	1.643	5.5	&	4.9	15	69	43	8.2	37.4	11	89.4	362.7	23	4.09	0.93	0.98	2.88	3.76	142	104	2.26	0.97
6	1	71	169	50	126	66	1	1	1	1	0	0	1	0	0	pulmonary infection	0	1	6.8	&	1	2.23	126	3.97	13.76	1.55	99.5	1.707	6.6	10	7.2	6.5	63	35	5.6	14	6.33	76.8	122	15.5	3.55	1.59	1.07	1.57	3.12	140	97	2.12	0.71
7	1	59	172	50	232	42	1	1	1	1	0	0	0	0	0	0	0	0	5.9	266.4	0.9	0.28	220	4.5	12.06	4.45	76.4	0.478	8.1	15.5	7.7	9.6	65	41	2.6	9.1	5.7	96	247.5	19	4.46	1.95	1.06	2.88	4.49	143	106	2.28	1.14
8	1	60	162	65	97	45	1	1	1	1	0	0	1	0	0	Urinary tract infection	0	1	11.4	&	0.97	1.22	192	7.53	16.33	1.81	108.6	1.942	&	&	8.9	21.9	72	42	4.2	14.5	4.8	81.4	500	33	4.36	1.96	0.92	2.63	4	139	100	2.35	0.8
9	1	53	176	50	110	35	0	0	0	0	0	0	0	0	0	0	0	0	9.6	&	1	0.32	140	4.05	13.27	1.82	85.4	0.624	5.8	&	4.2	11.7	65	42	4.4	18.9	3.71	74	288	11	4.41	1.28	0.9	3.24	3.68	143	105	2.21	1.13
10	1	67	175	72	178	47	0	0	1	0	0	0	0	0	0	0	0	1	5.4	338.6	0.96	0.51	173	4.32	13.14	1.87	97.6	3.396	6.3	&	4.9	43.5	63	37	3.7	13.9	5.36	84	261	30	4.53	2.33	0.93	2.99	4.07	141	104	2.16	0.85
11	2	76	160	50	172	63	0	0	1	0	0	0	0	0	0	Urinary tract infection	0	1	8	294	0.89	0.31	188	3.86	15.86	1.57	111.7	2.551	5.3	6.9	5.1	12.3	68	43	3.8	13	4.28	43	252	17	4.03	1.09	1.66	2.28	3.51	144	105	2.15	1.31
12	2	83	155	50	160	49	0	0	1	1	0	1	0	1	0	Pulmonary infection	0	1	9.7	397.4	0.97	0.86	255	3.2	14.27	1.22	90.9	3.729	7.5	13.6	8.1	11.4	67	40	3.5	13.3	5.99	62	351	18	5.52	1.66	1.19	3.93	4.49	139	102	2.26	1.02
13	2	62	160	45	155	56	0	0	1	0	0	1	0	0	0	0	0	0	5.7	313.9	1.04	0.7	188	4.29	11.02	1.78	82	1.828	6.1	11.2	5.2	82.1	72	48	3.5	10	5.82	61.4	346	55	5.4	2.65	1.42	3.06	4.28	143	103	2.43	1.3
14	1	63	170	75	154	36	1	1	1	1	0	0	0	0	0	0	0	1	12.5	&	1.02	1.16	169	4.67	16.02	1.95	115.8	0.604	9.1	16.6	10.2	38.4	70	46	3.7	9.3	6.53	67	277	25	4.04	1.43	0.81	2.75	4.2	143	103	2.2	1.02
15	1	57	170	72	186	82	1	0	0	0	0	0	0	0	0	0	0	1	10.9	413.3	0.96	2.54	222	4.45	18.72	1.73	104.1	0.008	6.3	9.3	7	24	65	42	5	14.8	7.39	60.6	223.8	30	3.84	0.78	1.11	2.21	3.95	141	104	2.19	0.74
16	1	57	172	50	182	45	0	0	1	1	0	0	1	0	0	0	0	1	5.1	&	0.9	0.71	226	4.81	18.43	1.68	111.8	0.418	5.7	7.1	5.8	21	70	44	2.6	8.8	7.67	86.7	357.3	18	4.56	3.1	0.86	2.93	3.47	144	103	2.4	1.1
17	1	82	166	50	156	70	0	0	1	0	0	0	0	0	0	0	0	0	5.7	&	0.98	0.55	153	3.7	15.84	1.52	148.2	0.81	5.5	&	4.7	15	61	39	4.9	17.6	4.4	80.4	363	32.2	4.35	1.08	1.08	2.9	4	137	98	2.16	0.91
18	2	75	158	50	127	50	0	0	1	1	0	0	0	0	0	Pulmonary infection	0	1	8.1	&	0.95	0.74	297	3.42	15.12	1.56	115.9	2.77	6.2	11.6	6	15	70	40	4.1	16.7	3.26	64.1	446.5	17	3.71	2.42	0.91	2.19	3.58	140	102	2.25	0.97
19	2	79	160	40	172	37	0	0	1	0	0	0	1	1	0	Urinary tract infection	0	1	8.5	&	0.94	0.53	239	4.03	19	1.75	120.1	4.317	5.4	&	4.8	9	71	43	3.4	14	4.78	69.5	232.2	17	4.11	1.31	1.19	2.73	3.93	143	102	2.36	0.86
20	1	60	170	50	165	48	0	0	1	0	0	0	0	0	0	0	0	1	5.8	358.5	0.92	0.88	258	&	&	&	&	&	5.6	&	4.2	12.7	65	41	1.4	15.2	5.06	69.5	294.5	12.9	3.94	1.33	0.96	2.62	3.48	143	101	2.28	1.14
21	1	65	170	50	188	45	1	0	1	1	0	1	0	0	0	0	0	0	9.7	220.4	1.11	0.44	258	3.61	20.15	1.58	142.9	2.364	8.5	13.9	10.2	16	71	41	4.2	12.9	7.17	108.4	196.6	13.7	5.55	2.01	1.07	3.68	3.88	144	106	2.26	0.89
22	1	68	168	68	111	45	1	0	1	1	1	0	0	0	0	0	0	1	2.6	457.1	1.05	1.76	129	4.85	20.12	1.61	103.2	0.837	&	&	7.7	20.8	63	41	4.5	11.2	7.85	84.8	389.6	12	2.41	0.99	0.9	0.99	3.85	147	111	2.22	0.89
23	1	58	172	63	230	47	1	1	1	1	0	0	0	0	0	0	1	0	19.1	&	0.9	0.19	22	4.93	18.6	1.5	104.3	1.221	11.6	18.7	13.1	21.3	63	&	2.7	11	&	60.8	237.7	17.4	6.1	3.67	1	4.37	3.88	135	97	2.25	1.23
24	1	58	170	50	207	30	1	0	1	1	0	1	1	0	0	0	0	1	6.7	394.8	0.97	0.22	304	4.93	20.42	1.83	107.1	3.066	6.2	8.3	5.1	19	76	46	4.6	17.2	4	80.7	311.2	28.9	5.05	2.38	1.06	3.57	3.62	141	99	2.29	1.03
25	1	46	170	72	225	46	0	0	1	0	0	1	0	0	0	0	0	1	8.3	&	0.98	3.58	222	3.93	11.84	1.33	73.8	0.384	6	6.3	5.8	47.4	72	48	3.9	&	&	78.2	392.8	20.9	5.74	2.08	1.11	4.01	3.75	141	103	2.27	1.08
26	1	66	174	63	69	33	1	1	1	1	0	1	0	0	0	0	0	1	14.5	&	0.96	0.4	245	4.13	18.21	1.32	70.6	0.812	7.5	11.8	8.1	16	68	43	4.8	15.7	5.02	72.2	255.8	16	4.53	2.31	1.05	2.83	4.01	141	103	2.3	0.83
27	2	75	150	50	120	68	0	0	1	0	0	0	0	0	0	0	0	1	&	418	0.97	0.21	224	3.73	12.27	1.68	95.7	2.12	5.8	10.39	5.2	29	69	39	1.9	8.2	3.53	55.3	230.1	21	5.21	1.42	1.25	2.66	3.81	141	102	2.18	1.01
28	1	39	172	72	90	42	0	0	1	1	0	1	0	0	0	Urinary tract infection	0	0	7.9	&	0.93	0.32	259	4.22	16.55	1.6	93.5	1.76	6.9	9.6	6.2	38	78	44	2	6.2	3.95	63.3	368.8	18	5.54	2.64	1.32	3.47	4.5	138	103	&	&
29	2	67	160	50	180	52	0	0	1	1	0	1	0	0	0	0	0	1	9	373.4	0.85	0.21	209	3.57	13.71	1.07	63.8	1.954	8.2	15.3	9	8.8	68	40	3	17	5.02	52	316.4	11.3	5.08	2.83	1.05	3.17	3.27	139	99	2.19	1.15
30	2	76	156	50	50	35	0	0	1	1	1	0	0	0	0	0	1	1	8.1	480.3	1.12	0.57	155	4.28	15.93	1.48	87.1	2.534	6.1	8.7	5.3	18.5	76	45	6.9	19.7	6.88	116.1	434.2	27.4	3.74	1.14	1.4	2.08	3.74	143	101	2.25	1.05
31	1	57	172	50	100	32	1	1	0	0	0	1	0	0	0	0	0	0	6.1	305.9	0.94	0.72	226	4.49	14.16	1.62	88.6	0.58	5.9	9.5	4.8	15.6	61	38	&	7.7	3.1	66.6	304.6	13.5	5.02	2.03	1.07	3.2	3.97	144	107	2.24	0.91
32	2	64	160	50	120	40	0	0	1	0	0	1	0	0	0	0	0	1	&	&	0.89	0.91	309	5.01	19.11	2.03	107.3	5.728	6.2	3.3	5.1	14.5	72	41	1.1	5.1	5.32	55.2	240.1	17.3	4.18	1.84	0.78	2.97	3.8	141	103	2.13	1.3
33	1	89	175	50	165	98	0	0	1	0	0	0	0	0	0	0	1	1	6	351.5	1.05	0.68	180	3.46	17.33	1.39	119.4	0.531	5.5	5.2	6.5	18.4	77	47	9.7	28.4	9.42	94.3	367.2	36.7	4.54	1.2	1.39	2.66	3.57	147	100	2.49	1.03
34	2	66	162	67.5	245	45	0	0	1	1	0	1	0	0	0	0	1	1	6.9	383.6	0.92	0.19	173	&	&	&	&	&	6.1	8.8	5.8	11.7	72	39	3	10.5	5.02	93.3	355.9	15.2	4.4	2.8	0.89	2.74	3.83	147	105	2.25	1.08
35	1	67	168	50	90	50	0	0	0	0	0	0	0	1	0	acute upper respiratory tract infection	0	0	8.2	&	1.01	0.42	172	3.76	15.93	1.17	81.4	0.383	5.7	7.9	5	10.3	&	41	3.9	13.2	3.74	80.7	282.6	20.2	3.35	0.11	1.16	1.78	4.07	141	102	&	&
36	1	84	172	50	165	135	0	1	1	0	0	0	0	0	0	Pulmonary infection	0	1	8	&	1.09	7.64	182	3.18	16.4	1.11	92.6	0.337	6.1	9.3	8.3	12.2	74	42	8.1	23.2	5.57	68.5	391.7	25.9	3.66	1.12	1.03	2.15	3.55	140	100	2.13	0.64
37	1	71	172	67	217	23	0	0	1	1	0	0	0	0	0	0	0	1	5.6	&	1.26	1.45	187	3.89	15.54	1.92	116.3	1.251	5.7	10.3	5.5	9.5	39	&	8.6	&	5.03	101.3	201.2	22.6	2.25	0.71	0.5	1.35	3.7	142	104	&	&
38	2	79	162	50	110	63	0	0	1	1	0	0	0	1	0	0	0	1	25.5	169.9	0.96	0.76	216	4.24	18.84	1.31	92.5	1.23	10.1	&	11.1	15.6	59	38	4.3	15.4	3.43	54.4	167.7	21.7	5.83	1.84	1.23	3.4	3.39	139	100	1.89	1.38
39	1	63	170	50	245	37	1	1	1	1	0	1	0	0	0	0	0	1	14.2	&	0.88	0.26	234	5.28	25.63	1.39	107.4	1.609	9.5	11.3	9	15.5	68	43	4.9	15.9	3.56	63.7	288.1	14.2	7.65	2.84	0.94	5.7	3.86	136	97	2.22	1.32
40	1	90	165	50	152	48	0	0	1	0	0	0	0	0	0	0	0	1	11.6	&	0.93	2.97	170	3.25	15.35	1.15	97.9	1.022	6.1	&	5.6	6.3	&	&	4.5	11.4	8.25	142.1	484.1	11.3	4.05	0.84	1.31	2.22	3.8	139	108	&	&
41	1	71	168	74	101	50	0	0	1	1	0	0	0	0	0	0	0	0	5.7	&	0.95	0.36	265	4.15	14.14	1.43	93.4	1.398	6.6	9.7	6.9	20.3	49	&	6.4	19.9	4.62	90.3	505	16.6	4.57	2.18	1.11	2.81	3.65	145	98	&	&
42	1	67	170	50	270	55	1	0	1	0	0	0	0	0	0	0	0	1	6.9	371.8	0.93	0.27	294	4.35	17.96	1.18	93.9	0.55	5.4	4.4	5.4	94	71	44	5	15.1	3.82	60.8	275.6	15.5	4.27	1.18	1.01	2.6	3.88	146	97	&	&
43	1	67	170	50	76	44	0	0	1	1	1	0	1	0	0	Upper respiratory tract infection	0	1	14.3	479.7	1.05	2.42	218	3.51	15.32	1.09	105	1.796	9.5	14.9	8.2	6.2	69	41	1.7	5.2	5.58	73	432.1	12.4	5.28	1.85	0.83	3.71	3.49	142	101	2.21	0.9
44	2	55	165	50	133	60	1	0	0	0	0	1	0	0	0	0	1	0	7.4	&	0.93	2.18	168	3.87	19.09	1.3	138	0.612	5.5	5.3	4.9	15.3	69	46	5.8	21.1	5.14	66.4	360	18.1	5.65	1.53	1.64	3.31	3.81	141	103	&	&
45	1	84	160	58	185	97	0	0	1	1	0	0	0	1	0	Pulmonary infection	0	1	7.5	319.9	0.95	2.59	202	2.73	15.27	1.23	104.5	0.349	7	8.1	6.9	6.9	61	37	4.2	8.5	6.16	94.3	288.6	15.4	3.67	1.28	0.85	2.32	3.51	142	101	2.04	0.86
46	1	63	175	50	180	11	0	0	0	0	0	0	1	0	0	0	0	1	7	&	1	0.24	157	4.36	17.16	1.67	127.4	0.573	6.1	7.4	5.5	41.6	68	45	4.4	&	4.86	97.7	405.5	19	4.5	0.95	0.99	3.09	4.22	140	101	2.37	0.89
47	1	73	170	50	212	65	0	0	0	0	0	1	0	0	0	Pulmonary infection	0	0	8.6	314	1.01	1.04	245	3.43	14.63	1.21	94.5	0.596	5.9	&	5.7	57.9	65	40	0.9	14.6	6.24	81.8	219.2	22.5	4.1	1.26	1.31	2.4	3.82	142	103	2.16	0.44
48	1	47	174	50	140	48	1	1	0	1	0	1	0	0	0	0	0	1	&	&	0.97	0.19	87	5	15.87	2.49	139.6	2.324	7.8	17.6	12.1	196	78	42	1.2	10	5.17	51.1	372.7	151	5.12	1.24	0.94	3.61	3.57	139	98	&	&
49	2	76	158	50	243	28	0	0	1	0	0	0	0	0	0	0	1	1	6.8	224.9	0.95	0.22	149	4.16	16.57	&	&	2.008	5.3	5	4.8	10.1	72	38	&	&	8.39	50.3	167.2	16.1	4.58	1.11	1.24	3.26	3.73	140	104	2.19	0.97
50	2	65	165	65	65	31	0	0	0	0	0	0	0	0	0	0	0	1	&	&	1.08	0.53	289	4.29	16.29	1.7	124.6	5.275	5.7	&	&	11.3	64	39	&	&	3.03	70.7	337.2	11.6	5.65	3.58	&	3	4.14	146	105	2.34	1.32
51	1	62	172	45	85	47	1	0	0	0	0	0	0	0	0	0	0	0	6.1	&	0.99	1.93	202	4.39	16.81	1.65	112.9	0.87	6.1	8.2	4.4	10.1	63	43	3	9.6	5.6	81.3	306.1	18.1	5.23	2.36	1.11	3.13	4.1	136	104	&	&
52	2	53	160	50	247	41	0	0	0	0	0	0	0	0	0	0	0	1	5.2	185	0.92	0.61	249	3.22	17.25	1.18	90	1.055	5.8	&	5.5	9.8	67	41	6.2	17.7	4.47	46.8	203.5	16.7	1.31	0.569	1.38	3.18	3.78	143	104	2.23	1.2
53	1	60	180	75	110	46	1	0	1	0	0	1	0	0	0	0	0	1	5.1	454.3	0.83	0.57	150	4.68	17.45	2.02	90.6	1.455	5.8	6.2	4.6	50.3	63	43	5.8	17.4	4.12	81.3	468	30.3	5.28	1.97	1.31	3.16	3.5	145	105	2.21	1.08
54	2	80	153	50	52	32	1	0	1	0	1	0	0	0	0	Pulmonary infection	0	1	8.6	284.2	1	5.17	212	2.76	17.46	1.24	128.4	0.96	6.1	&	&	26.9	76	40	3	13.6	8.69	69.4	135.2	23.9	5.05	2.29	0.92	3.07	3.94	143	112	2.12	0.87
55	1	61	170	60	205	62	1	1	0	0	0	0	0	0	0	0	0	1	4.8	217.5	0.94	0.49	186	4.29	14.63	1.62	71.7	5.941	5.7	7.9	5	14.2	64	41	&	&	4.17	85.1	189.8	22	4.56	1.54	1.39	2.46	3.87	143	105	2.13	1.01
56	2	67	170	50	173	59	0	0	0	0	0	1	0	0	0	0	0	1	5	&	0.89	0.19	208	5.09	20.32	2.16	123.3	1.319	5.5	6.4	4.9	14.4	67	41	1.4	7.5	4.86	61.9	180.8	16.4	6.23	2.14	1.33	4.65	4.05	146	105	2.25	1.22
57	1	81	158	50	80	33	1	1	1	1	0	1	0	0	0	0	0	1	13.4	322.3	0.92	0.52	171	3.38	14.08	0.87	64.1	1.467	9.6	&	10.3	14.7	73	41	5.5	15.3	3.6	80.4	277.5	16.5	4.83	1.54	1.05	3.43	3.58	141	99	2.18	0.8
58	1	63	173	50	70	44	1	0	1	0	0	1	0	0	0	Pulmonary infection	1	1	5.3	379.5	0.99	0.36	293	4.09	15.24	1.61	90.2	1.256	5.8	9.9	6.1	12.9	62	40	3.5	9.1	6	72.9	274.5	16.1	4.19	2.05	1.02	2.79	4.07	141	105	2.19	1.05
59	2	69	158	50	110	32	0	0	1	0	0	0	0	0	0	0	0	1	5.9	213.5	0.98	0.38	176	3.57	14.81	1.22	103.2	2.537	&	&	&	14.2	&	41	5.6	15.9	4.28	62.1	199.2	19	4.68	1.24	1.32	3.03	3.85	142	104	2.19	0.93
60	2	69	156	50	191	70	0	0	1	1	0	0	0	0	0	Urinary tract infection	0	1	11.2	&	0.86	0.48	232	3.95	17.8	1.33	122.2	1.157	7.8	&	7.2	8.2	66	43	4.8	12.8	5.48	60.4	276.1	7.5	4.19	1.47	1.13	2.67	3.67	140	100	2.23	1.42
61	2	85	150	42	85	35	0	0	1	0	0	0	1	1	0	0	0	1	10.9	207	1.11	9.92	133	3.17	15.27	1.21	110	1.136	5.6	6.3	4.6	14.3	64	38	10.3	26.7	2.64	64.6	111.6	30.1	4.28	0.72	1.93	2.22	3.97	141	99	2.1	1.09
62	1	64	170	52	215	52	0	0	1	1	0	0	1	0	0	0	0	1	6.9	418.5	1.11	0.33	114	4.33	13.26	1.39	59.8	1.375	6.2	12.7	6.1	26.5	66	41	4.6	11.7	4.5	94.7	333	21.4	2.86	0.98	1.07	1.4	3.73	146	106	&	&
63	2	79	152	50	120	60	0	0	1	0	0	0	0	1	0	Urinary tract infection	0	1	6.9	327.3	1.05	3.34	153	2.92	15.18	1.11	94.1	1.828	6.2	&	4.6	11.6	69	40	7.3	21.7	4.51	69.6	301.8	14.8	5.09	1.34	1.51	3.18	3.34	141	101	2.33	0.91
64	1	59	175	67.5	120	55	1	1	1	0	0	0	1	0	0	0	0	1	8.5	&	1.07	2.38	163	3.38	18.1	1.19	75.7	0.321	5.7	&	4.6	8.5	69	46	&	&	&	130.5	639.6	20.9	5.42	2.04	1.44	3.13	3.7	143	104	2.14	1.01
65	1	67	172	60	105	49	0	0	1	0	0	1	0	0	0	0	0	0	4.3	&	1.07	0.44	185	3.15	21.82	0.68	33.8	1.221	5.9	9.2	4.9	23.2	64	40	6	16.7	3.94	82.7	293.1	13.9	4.81	1.12	1.12	2.97	4	139	103	2.18	0.75
66	1	65	172	63	120	67	1	1	1	0	0	0	0	0	0	0	0	1	7.2	&	1	0.31	238	5.6	17.01	1.89	115	1.507	5.7	&	4.6	28.1	&	43	&	4.3	3.54	76.2	461.8	24.7	2.46	1.2	0.8	0.89	4.24	143	107	2.3	1.19
67	1	69	175	50	236	33	1	0	1	0	0	0	1	0	0	0	0	1	5.7	&	0.99	0.58	163	4.35	16.1	1.59	135.3	1.118	5.3	6.9	5.1	15.7	57	36	3.2	6.5	6.78	101.1	376.3	13.9	2.72	0.97	0.94	1.02	4.09	143	108	2.12	1.27
68	1	65	176	77	95	51	1	0	1	0	0	0	0	0	0	0	0	1	&	&	0.95	0.54	202	4.38	16.56	1.36	112.8	1.547	6.4	7.6	5.5	17.5	60	40	3.4	9.6	6.06	77.6	398.8	18.9	4.41	2.09	0.79	2.63	3.97	141	105	2.11	0.98
69	2	66	155	50	135	32	0	0	1	1	0	1	0	0	0	0	0	1	10.7	&	0.95	0.19	196	4.13	16.3	1.81	120.3	2.841	5.8	9.3	6.1	20.2	60	40	3.5	10	7.01	61.8	426.6	16.5	5.54	1.88	1.26	3.45	3.53	144	106	2.09	1.12
70	2	58	157	50	169	50	0	0	1	0	0	1	1	0	0	Upper respiratory tract infection	0	1	6.4	&	1.05	1.65	177	3.59	15.5	1.17	80.3	0.373	5.6	6.6	5.2	14.2	70	47	3.6	9.6	5.59	74.5	299.5	19.8	7.57	1.33	1.55	5.03	3.94	141	102	2.24	1.34
71	1	63	170	50	230	44	1	0	0	1	0	0	0	0	0	0	0	1	13	&	1	0.2	235	4.05	16.3	1.53	81.1	0.546	6.3	10.4	6.6	19.4	69	46	6.2	20.3	3.55	598	321.2	11.9	5	2.57	1.07	2.84	3.39	139	99	2.37	1.12
72	1	62	159	40	180	40	0	0	1	0	0	0	0	0	0	Pulmonary infection	0	1	&	&	1	0.53	211	4.3	20.89	1.66	122.5	1.665	5.8	10.9	5	12.5	67	41	7.3	17.4	2.69	62.5	195.7	26.1	4.75	1.28	1.47	2.55	3.55	143	105	2.17	0.83
73	1	80	168	50	105	54	0	0	0	0	0	0	0	1	0	0	0	1	4.9	&	0.97	0.68	200	4.12	16.91	1.45	83.3	1.146	5.6	9.1	4.9	7.5	55	37	5.2	14	3.23	71.4	299.5	9.3	3.94	0.72	1.11	2.33	3.83	144	106	1.99	0.83
74	1	61	179	68	105	50	1	0	1	0	0	0	0	0	0	0	0	1	6.7	&	0.98	0.33	156	4.17	17.34	1.25	71.1	0.472	5.2	&	4.9	2	66	43	5.2	26.3	4.57	75.2	294.7	4.3	3.26	1.28	1.44	1.25	3.47	140	102	2.19	0.99
75	1	65	180	69	140	25	1	1	1	1	0	0	0	0	0	0	0	1	15.7	215.2	1	0.55	226	&	&	&	&	&	11.2	23	13.6	9.8	69	46	15.6	17	5.74	78.6	190.8	16.8	4.45	0.91	1.02	2.61	4.56	139	100	2.37	1.12
76	2	67	158	50	170	50	0	0	1	0	0	0	1	1	0	0	0	1	&	&	0.95	3.95	288	&	&	&	&	&	6.1	8	9	15.2	81	47	3.9	12.1	3.56	58.7	471.9	21.4	4.21	1.5	1.18	2.03	4.28	138	97	2.35	1.04
77	1	68	170	50	130	41	1	0	1	1	0	1	0	0	0	Upper respiratory tract infection	0	1	14.7	275.5	0.96	0.34	117	3.73	21.3	1.38	104.1	0.512	11.9	10.1	12.8	7.6	59	42	4.4	18.2	6.2	86.3	240.6	13.2	4.56	1.24	1.39	2.96	3.21	141	100	2.16	0.91
78	1	55	172	75	200	27	0	0	0	0	0	0	0	0	0	0	0	1	7.9	398.4	0.92	0.19	253	4.41	17.89	1.46	68.7	1.949	5.7	&	5.5	27.3	79	43	3	12.1	4.4	75.3	398.4	31.8	4.8	3.38	0.95	2.55	3.7	134	100	2.22	0.96
79	1	66	165	50	251	9	1	0	1	1	0	0	0	0	0	0	0	1	13	&	0.98	1.67	176	4.77	19.71	1.83	104.5	1.184	10.6	22	11.3	8.5	62	41	1.7	6.5	7.5	86.4	296.3	11.9	3.98	1.29	1.01	2.42	4.36	141	101	2.24	1.37
80	1	57	170	50	180	30	1	1	0	0	0	0	0	1	0	0	1	0	5.6	471.3	0.99	0.93	149	3.97	17.96	1.38	87.6	2.275	5.2	&	5.4	24.6	76	42	3	16.8	3.8	57.3	471.3	25.9	3.29	1.23	1.12	1.23	3.8	137	104	2.23	0.61
81	1	68	165	54	70	30	1	0	0	0	0	0	0	1	0	Pneumonia	1	0	5.2	422.9	0.97	2.72	167	&	&	&	&	&	6	6.1	6	76.9	73	44	4.5	15	6.8	91.8	335.8	90.3	3.68	2.69	0.67	1.89	4.17	139	100	2.37	0.89
82	2	91	160	50	75	50	0	0	1	0	0	1	0	1	0	Pulmonary infection	0	1	6.1	&	0.96	1	264	&	&	&	&	&	6.3	8.9	5.9	25	&	38	3.1	11.7	&	100.4	457.7	18.2	5.92	4.9	0.75	3.06	3.78	142	105	2.28	0.88
83	2	47	168	72	39	39	0	0	1	1	0	1	0	0	0	0	0	0	9.8	&	1.02	0.35	538	3.88	20.99	1.83	117.4	1.583	7.1	11	7.7	20.6	74	42	2.1	5.7	45	216.2	216.2	15.9	4.62	4.66	1.04	2.03	3.86	140	96	2.31	0.96
84	1	60	178	50	106	38	1	1	1	1	0	1	0	0	0	0	0	0	8	&	0.96	0.44	225	4.17	15.86	1.71	117.1	1.555	&	6.1	12.1	29.3	68	44	3.1	12.7	6.4	95.7	445.9	20.9	5.46	2.55	1.17	3.67	3.79	147	108	2.31	1.08
85	2	75	158	50	96	40	0	0	1	0	0	1	0	1	0	0	0	1	7.6	382.3	1.16	0.31	169	3.84	17.66	1.76	167	2.178	5.5	&	4.8	10.1	67	41	7	21.3	4.2	56.4	305.8	15.6	5.03	1.23	1.15	3.36	4.2	145	105	2.29	1.22
86	2	64	160	50	95	52	0	0	1	1	0	0	0	0	0	0	0	1	12.5	&	1.12	1.27	143	4.18	16.84	1.86	117.9	0.844	5.7	12.2	4.4	28.2	69	44	4.3	16.1	4.7	45.9	353.7	30.4	3.99	0.9	1.25	2.31	3.95	146	107	2.27	1.18
87	1	85	170	50	85	58	0	0	1	0	0	0	0	1	0	0	0	1	8	&	1.22	1.48	181	3.04	17.07	1.01	99.4	1.274	&	8.9	5.2	15.2	69	41	11.8	31.9	5.15	91.4	259.5	29.9	3.69	1.02	1.66	1.23	4.35	144	106	2.26	0.83
88	2	54	165	50	128	45	0	0	1	1	0	1	0	0	0	0	0	1	7.1	&	1.01	0.34	234	4.95	18.65	1.56	99	2.027	6.3	9.9	5.3	36.4	70	42	2.8	7.7	2.98	62.8	286.9	27.3	4.58	2.14	0.7	2.91	1.3	141	103	2.35	1.07
89	1	68	169	50	210	90	1	1	0	1	0	1	0	0	0	Pulmonary infection	0	1	13.1	268.2	1	1.24	190	3.82	15.8	1.32	103.7	0.42	8.5	11.7	9.3	10.7	75	46	4.1	15.6	5.8	70.6	254.6	11.8	6.29	1.52	0.97	4.77	3.62	143	104	2.38	1.07
90	1	74	170	50	237	57	0	0	1	1	0	1	0	0	0	0	0	1	7.1	371.6	1.09	0.31	210	4.67	22.23	1.89	140.6	1.953	6	15	4.6	12.1	71	44	3.9	19.7	7.3	70.7	400	11.8	6.06	1.25	0.84	4.44	4.18	143	109	2.32	1.13
91	1	73	170	50	80	57	0	1	1	0	0	1	0	0	0	0	0	1	6.6	&	0.89	0.19	190	4.07	15.81	1.49	78.1	1.567	6.2	6.4	6.5	33.3	59	40	3.2	11.7	5.2	95.6	400.7	21.3	5.45	1.5	1.08	3.54	4.1	144	108	2.23	0.72
92	1	71	176	50	150	59	0	0	1	1	0	0	1	0	0	Pneumonia	0	1	7.2	456.1	1.12	0.7	319	3.82	16.34	1.24	84	1.081	5.9	12.5	4.8	10.1	62	36	2.9	10.6	4.8	92.7	334.5	14.3	4.61	0.62	1.04	3.14	3.86	147	109	2.1	0.87
93	2	59	160	50	118	51	0	0	1	1	0	1	0	0	0	0	0	1	10.7	&	0.97	0.91	270	3.66	14.13	1.3	119.2	3.354	10.2	15.7	9.1	16.3	65	39	2.7	9.2	4.77	44.8	266.3	13.8	5.91	7.19	0.75	2.52	3.6	143	102	2.24	1.38
94	2	61	158	50	203	25	0	0	1	1	0	0	0	0	0	0	0	1	6.9	&	0.92	0.19	316	3.84	14.64	1.32	92.3	2.772	6.9	8.4	6.5	20.1	69	42	1.9	6.3	&	48.8	296.4	16.4	5.65	1.25	1.23	3.83	3.73	144	104	2.22	1.13
95	1	61	178	50	94	40	1	0	1	1	1	0	1	0	0	0	0	1	14.1	322.8	1.05	0.52	226	5.28	17.21	1.78	91.5	0.61	9.8	23.4	15.7	14.7	56	34	1.3	3.7	10.9	125.3	330.6	17.5	3.98	1.16	1.16	2.13	4.12	142	101	2.19	1.31
96	1	81	165	50	94	32	1	0	1	1	0	0	1	0	0	0	0	0	6.5	444.5	1.05	1.8	141	5.06	14.28	2.27	116.6	1.948	5.9	8.2	5.6	32.1	64	39	2.6	7.6	6.4	79	458.1	31.1	4.3	1.34	1.19	2.44	3.97	146	108	2.14	1.08
97	1	83	170	50	206	131	0	0	1	0	0	0	0	0	0	bronchitis	0	1	7.3	&	0.94	0.93	256	2.43	15.61	0.9	89.2	0.726	6.4	9.2	6.9	15.6	66	39	7.4	24	3.2	73.7	89.4	46.2	4.39	0.65	1.65	2.53	3.64	129	94	2.16	0.96
98	1	64	175	50	167	57	1	1	1	1	0	0	0	0	0	0	1	1	9.6	&	1.06	0.78	162	4.34	18.61	1.82	109.4	0.988	5.7	&	6.4	23.9	65	42	&	&	4.2	72.4	367.5	20	3.83	1.77	0.84	2.37	3.73	146	108	&	&
99	2	65	156	50	110	38	0	0	1	0	0	0	0	0	0	0	0	1	6.3	&	1.02	0.87	269	3.31	15.78	1.32	98.2	3.624	5.1	7.8	4.5	10.2	66	39	6.5	30	4.2	63.3	222.3	14.9	3.54	0.92	1.21	2.06	3.85	144	109	2.53	1.01
100	2	61	163	45	100	44	0	0	1	1	0	1	0	0	0	0	0	0	9.8	&	0.92	1.19	243	5.41	22.32	1.85	119.1	2.985	7.1	15.4	6.6	10.6	65	40	3.1	14	4.8	51.1	309	15	8.26	2.06	1.63	5.7	3.88	145	101	2.29	1.18
101	2	64	165	50	139	54	0	0	0	0	0	0	0	1	0	0	0	1	&	&	1.04	1.05	245	4.44	16.73	1.42	87.4	2.775	6.2	4	5.2	16	69	41	3.7	14.3	5.1	52.2	277.2	20	4.43	1.06	1.12	3	3.77	146	107	2.08	0.9
102	2	66	156	58	225	50	0	0	0	0	0	1	1	0	0	0	0	1	6.2	&	0.97	0.24	205	3.57	16.51	1.5	114.3	0.897	6.2	6.3	4.9	12.8	&	&	&	10.1	4.4	65.4	237	18.5	5.63	1.19	1.25	3.59	4.27	144	107	2.27	1.11
103	2	83	155	50	135	53	0	0	1	1	0	0	0	1	0	0	0	0	6.3	&	1.09	1.75	208	3.22	17.86	1.15	86.2	2.237	5.5	8.4	5	36.7	70	42	3	16.4	10.7	60.4	308.2	34.5	3.61	1.01	1.14	1.98	4.1	141	102	2.25	1.13
104	1	54	172	50	60	29	1	0	1	0	0	1	0	0	0	0	0	1	6.8	295.7	0.88	0.19	199	3.93	21.15	1.23	122.6	0.725	6	&	5.8	16.9	69	48	6.4	&	4.3	62.1	267.8	14.7	6.21	1.64	1.34	4.19	3.9	143	103	&	&
105	1	63	170	50	110	46	0	0	1	1	0	0	0	0	0	0	0	1	&	&	0.92	0.63	150	4.24	15.59	1.67	87.2	0.871	7.3	&	10.1	12.4	59	37	2.9	10.9	6.8	83.2	359.5	14.5	4.35	1.42	0.97	2.97	4.36	142	106	2.06	0.89
106	1	74	160	50	72	33	0	0	1	0	0	0	1	0	0	0	0	1	5.7	407.5	1.05	0.58	161	4.06	13.49	1.56	81.4	0.864	5.7	&	5	7.9	71	36	5.6	21.5	4.9	79.2	392.3	14.3	4.63	0.58	1.33	2.94	3.97	140	104	2.24	0.97
107	1	85	170	50	165	51	1	0	1	0	0	0	0	0	0	0	0	1	5.1	452.8	0.93	3.49	148	4.22	19.44	1.37	126.2	1.013	5.8	5.8	5.6	7.6	60	37	2.1	12.8	4.2	71.5	415.5	25.8	4.26	1.44	0.79	2.87	5.85	138	105	2.27	1.06
108	2	67	170	50	185	58	0	0	1	1	0	0	0	0	0	0	0	0	7.9	&	1	0.19	151	4.63	19.06	1.57	112	2.386	6.4	&	5.5	10	76	45	3.4	11.3	5.6	67.6	272.2	12.8	4.85	0.99	1.42	3.05	4.85	144	100	2.45	1.3
109	1	69	163	63	166	44	0	0	1	0	1	0	0	0	0	0	0	1	6.8	208.6	0.99	0.56	169	4.58	16.47	1.97	159.5	8.008	5.9	&	5.6	40.2	75	42	5.4	17.7	4.1	57.4	182.7	34	3.66	1.8	1.23	1.69	4.17	141	102	2.27	1
110	1	68	160	50	155	60	0	0	0	1	0	0	0	0	0	0	0	0	13.2	&	0.93	0.23	166	4.26	18.97	1.35	93.1	1.529	&	12	7.5	10.6	59	40	3.6	15.4	4.3	67.3	238.9	16.4	4.28	1.27	0.98	2.49	3.66	144	106	2.14	0.87
111	1	60	182	80	150	45	0	0	1	1	0	1	1	0	0	0	0	0	&	&	0.93	1.59	165	3.94	17.33	1.43	113.7	3.081	6.8	&	12.3	13.1	69	42	2.6	11	8.8	113.4	439.6	15.9	6.57	3.74	0.9	4.09	4.42	140	101	&	&
112	1	66	165	50	132	25	1	1	1	1	0	1	0	0	0	0	0	0	9	&	0.92	1.77	335	4.86	18.12	1.91	116.5	1.257	6.5	&	6.6	23	68	43	2.1	7.7	4.5	72.3	277.4	14.9	6.08	1.73	1.21	4.36	3.85	144	108	&	&
113	2	54	150	50	195	45	0	0	1	0	0	1	0	0	0	0	0	1	6.1	307.1	1	0.19	213	4.14	16.12	1.42	67.3	3.397	5.3	8	5.3	53.5	&	&	&	&	5.7	48.3	307.1	44.1	5.33	5.14	1	2.53	3.8	142	105	&	&
114	1	40	170	50	130	104	0	0	0	0	0	1	0	0	0	0	0	0	&	&	0.8	0.19	259	4.39	15.08	1.4	131.9	0.423	5.8	7.2	5.1	51.6	69	44	2.9	4.7	2.4	69.3	531.4	22.9	4.68	3.2	0.8	2.57	3.66	143	103	2.24	1.23
115	2	75	159	50	95	44	0	0	1	0	0	0	0	1	0	0	0	1	6.9	&	0.98	6.12	163	4.14	15.88	1.26	137.5	3.363	6	&	4.3	11.5	63	42	4.8	17.8	5.2	83.6	288.8	18.1	5.25	0.92	1.66	2.89	3.87	147	104	&	&
116	1	54	168	50	183	111	1	1	1	0	0	0	0	0	0	0	0	1	5.6	&	0.92	0.54	326	5.32	18.74	1.73	135.9	1.442	6	7.6	4.5	11.4	70	43	2.6	9.6	4.9	76.9	302.4	16.4	5.19	5.3	1.02	2.35	3.84	146	103	2.24	0.9
117	1	63	178	50	145	51	1	1	1	0	0	0	0	0	0	0	0	1	5.5	&	0.83	0.2	193	5.2	13.95	1.27	78.3	1.412	5.4	&	4.7	8.7	63	40	3.4	11.5	4.8	71.9	343.1	14.9	4.88	0.73	1.86	2.73	3.81	143	102	2.22	1.07
118	1	76	163	40	130	30	1	0	1	0	0	0	0	1	0	Pulmonary infection	0	0	6.3	&	0.95	2.12	171	4.9	18.71	1.8	105.8	2.631	5.3	&	4.2	11.2	70	40	4.1	14.8	8.1	83.9	367.1	18.9	3.57	0.65	1.25	2.01	4.51	141	101	2.35	1.12
119	2	86	148	29	93	33	0	0	1	0	1	0	0	1	0	Pulmonary infection	1	1	5.6	319.9	&	7.3	125	2.83	20.63	0.82	122.5	1.42	5.1	&	5.9	11.6	49	33	5.8	16.7	5.2	57.3	210.5	19.8	3.57	1.64	1	2	4.22	144	111	2.05	0.71
120	2	69	152	50	108	75	0	0	0	1	0	1	0	1	0	0	1	0	24.3	&	0.96	0.28	168	3.75	12.63	1.34	83.7	3.883	12.9	14.3	14.8	14.4	66	39	3.8	14.7	7.5	76.5	303.5	19.7	4.64	4.21	0.96	2.41	3.96	139	99	&	&
121	1	55	165	50	80	50	1	1	1	0	0	0	0	0	0	0	0	1	&	&	0.81	0.19	198	5.32	16.04	1.54	87.5	0.811	4.9	9.6	4.9	16.6	66	42	3.8	14.1	2.9	48	183.9	14.3	4.89	1.38	1.8	2.64	3.3	140	100	2.31	1.23
122	2	75	167	50	70	30	0	0	1	1	0	0	1	1	1	0	0	1	5.9	&	1.67	4.48	146	3.33	18.73	1.15	132.4	0.761	6.1	&	5.7	13.8	72	47	9.1	24.2	6.5	81.8	395.1	&	4.33	0.57	1.55	2.29	4.68	138	100	2.31	1.25
123	2	69	165	50	143	48	0	0	1	1	0	0	0	0	0	Upper respiratory tract infection	0	1	9.7	222.4	0.9	0.38	253	3.85	15.54	1.97	123.6	1.346	6.9	13.7	7.3	23.1	75	46	2.3	8.4	4.3	49.5	222.5	25.3	3.73	1.75	1.23	2.05	3.71	145	107	2.33	1.17
124	2	69	156	26呕血	90	45	0	0	1	1	0	1	0	0	0	0	0	1	15.3	342.6	0.97	0.44	284	3.56	19.14	1.44	120.3	0.471	8.7	8.2	9.8	11.1	72	42	&	17.7	3.2	57.7	272.9	21.6	5.69	4.21	1.01	3.67	3.4	141	105	2.31	1.16
125	1	70	165	50	185	45	0	0	1	1	0	1	0	0	0	0	0	1	8.4	441.1	1.02	0.41	203	4.64	15.02	1.32	86.4	2.879	7.8	&	6.9	24.7	70	42	6.5	25.7	5.3	80.4	389.2	27.2	3.68	2.35	0.98	2.23	3.73	141	106	2.17	0.88
126	2	50	158	50	160	56	0	0	0	0	0	0	0	0	0	0	0	0	5.4	336.7	0.97	0.21	204	4.31	14.16	1.56	83.3	5.359	4.9	6.7	4.8	6.6	65	41	1.8	6.8	3.4	47.6	239.5	15.2	4.53	3.22	1.02	2.71	3.43	140	103	&	&
127	1	54	168	50	100	52	0	0	1	0	0	0	1	0	0	0	0	1	5.3	&	0.85	3.15	220	4.87	19.28	1.62	125.9	0.744	5	&	4.5	16.4	62	41	3.6	13.5	3.9	72.4	274.5	20.3	4.52	4.98	1.2	2.8	3.61	145	101	2.27	1.28
128	1	55	168	50	90	42	1	0	0	0	0	1	0	0	0	0	0	0	6.2	&	0.94	0.19	200	4.74	16.02	1.64	109.2	0.987	5.2	&	4	22.8	67	42	3.3	&	2.9	71.2	280.8	26	4.54	2.42	0.87	2.87	3.57	144	104	&	&
129	1	47	178	50	245	63	1	0	0	1	0	0	0	0	0	0	0	0	7.1	&	0.85	0.19	212	4.25	15.96	1.38	104.1	1.137	7.5	16.3	6	18.6	67	44	2.3	5.8	6.1	92.9	306.7	11.8	4.06	1.86	0.9	2.41	3.88	140	102	2.26	1.05
130	2	81	156	40.5	170	50	0	0	0	0	0	0	1	1	0	0	0	1	5.2	&	1.03	0.33	258	4.28	18.95	1.3	115.7	0.926	5.9	7.1	4.8	7.2	58	37	2.2	9.1	6.9	81.3	338.1	13.2	5.92	0.99	1.35	4.2	3.58	143	104	2.14	1.12
131	1	71	&	45	228	48	0	0	0	0	0	1	0	0	0	0	0	1	&	&	0.92	0.34	182	3.83	16.33	1.23	83.2	0.671	6.2	5.9	5.3	9.8	66	39	3.2	12.2	4.1	58.5	353.1	18	5.47	1.61	0.96	4.11	3.7	138	100	2.13	0.83
132	1	64	&	50	215	42	1	0	1	0	0	0	0	1	0	0	0	1	&	&	1.04	1.76	149	4.74	18.74	1.31	115.3	1.344	5.8	8.5	4.9	17	70	41	2	6.9	7.3	99.6	465	18.1	3.9	2.41	0.67	2.45	4.3	141	101	2.21	0.91
133	1	77	&	50	90	80	1	0	1	1	0	0	0	1	0	Pulmonary infection	0	1	&	400.7	1.14	0.69	193	&	&	&	&	&	5.5	&	4.5	16.7	&	42	8.8	35.2	4.7	109	447.3	20.2	4.02	1.32	0.82	3.09	2.95	144	104	2.11	0.92
134	1	68	&	50	175	30	0	0	1	1	0	0	0	0	0	Pulmonary infection	0	1	10.5	392.7	1.01	0.38	183	3.73	17.17	1.31	119.7	3.099	7.9	&	6.8	10.3	72	40	1.9	6.1	5.4	92.8	388.9	11.7	4.48	1.78	0.78	3.34	3.22	144	105	2.12	0.98
135	2	74	&	50	213	93	0	0	0	1	0	0	0	0	0	0	0	0	15.6	&	0.91	0.6	172	3.81	20.24	1.2	84.6	0.508	9.3	18.6	7	19.7	61	38	2	7.4	5.3	39	196.3	13.4	4.68	1.12	1.41	3.22	3.72	143	107	2.1	1.23
136	1	58	&	50	45	34	1	1	0	0	0	0	0	0	0	0	0	1	&	&	0.92	0.19	282	4.99	18.48	1.51	86.3	2.022	&	5.5	4.3	12.5	10	41	2.6	8.6	3.6	92.3	287.9	13.1	4.69	1.09	1.85	2.77	4.22	143	100	2.37	1.25
137	1	68	&	50	130	55	0	0	1	0	0	0	0	0	0	0	0	1	&	&	0.98	0.42	165	4.64	14.42	1.36	85.7	1.581	6.1	9.3	5.8	17.2	68	39	4.9	16.8	3.4	76.7	437.3	17.7	4.27	1.69	1.08	3.17	&	&	&	2.17	0.92
138	1	49	&	50	190	15	1	1	0	0	0	0	0	0	0	0	0	0	6	405.9	0.87	0.49	287	5.12	20.65	1.57	76.6	0.951	5.5	&	4.7	10.9	62	44	2.4	9.7	4.6	74.4	373.2	12.3	3.45	0.92	1.17	2.04	4.08	141	108	2.16	1.18
139	1	73	&	50	170	44	0	0	1	1	0	0	0	0	0	0	0	1	&	&	0.96	0.58	260	103.6	18.26	1.64	4.29	1.042	5.7	8.1	4.4	8.6	60	&	4	15.4	4.7	94.3	248.9	16.2	3.88	1.25	0.84	2.87	3.98	143	105	2.15	1.2
140	1	66	&	50	115	42	1	0	1	1	0	1	0	0	0	0	0	0	&	&	0.94	0.25	172	5.45	19.8	1.87	134.3	0.329	5.7	9.7	6	13.1	61	42	2.1	7.9	3.5	70.7	257.7	15.2	3.52	2.43	0.76	2.2	4.01	141	101	2.15	0.78
141	1	59	&	50	109	59	1	1	1	0	0	1	0	0	0	0	0	0	&	&	1.01	0.62	326	&	&	&	&	&	6.2	&	4.5	14.1	68	41	3.1	13.8	4.8	108.4	210.2	14.8	5.48	2.28	0.87	3.74	4.43	141	105	2.14	0.87
142	1	58	&	50	70	40	1	1	1	1	0	1	0	0	0	0	0	1	14.9	&	0.91	0.63	139	4.62	14.16	1.67	101.4	2.111	9.5	&	9.2	2.4	60	35	2	8.8	5.1	72.7	463.1	12.5	10.23	11.65	1.04	4.34	3.38	141	103	2.25	0.94
143	1	54	&	50	140	35	1	0	1	1	0	1	1	0	0	Upper respiratory tract infection	0	1	25.8	&	0.97	0.32	194	3.6	14.85	1	97.2	1.062	12.3	20.4	15.9	11.2	67	40	3.3	12.2	8.3	104	404.7	7	5.84	1.74	1.1	4.07	3.98	138	98	2.19	0.95
144	2	59	&	50	130	40	0	0	0	0	0	0	1	0	0	0	0	1	7.1	382.4	0.93	0.19	220	&	&	&	&	&	5.9	13	5.4	47.8	86	&	3	6.4	5.5	46.6	382.4	52.4	4.07	1.2	0.98	3.01	3.9	146	105	&	&
145	1	59	&	50	150	35	1	0	1	1	0	0	1	0	0	0	0	1	16.5	&	0.94	0.29	136	4.22	20.18	1.45	99	0.733	10.9	&	5.2	8.4	61	37	&	9.5	6.8	52.4	368.9	8.4	4.36	1.67	0.75	3.3	&	&	&	&	&
& means no avaliable data
[truncated: 13 more columns]
